# Supplementary material for: Using the drug-protein interactome to identify anti-ageing compounds for humans
Source: PubMed Central journal article supplement (PMC6342327; doi:10.1371/journal.pcbi.1006639), 2019-01-09

**A**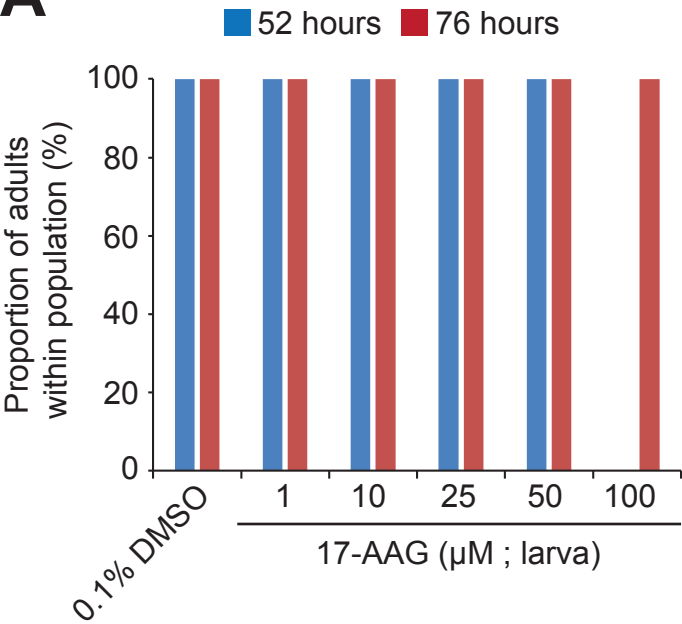**B**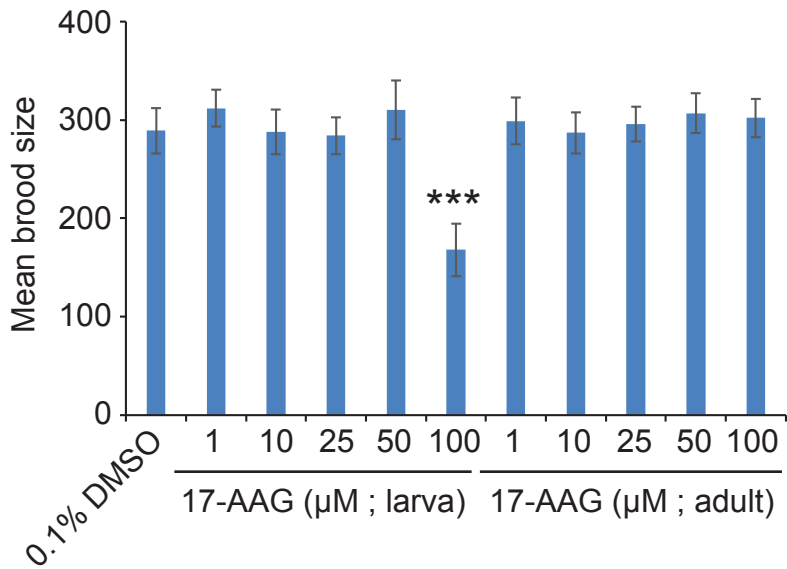

Supplement: pcbi.1006639.s003.pdf [file pcbi.1006639.s003.pdf]
